# Supplementary material for: SARS-CoV-2 neutralizing antibodies; longevity, breadth, and evasion by emerging viral variants
Source: bioRxiv or medRxiv preprint supplement (doi:10.1101/2020.12.19.20248567), 2021-01-23

Supplementary Figure 4

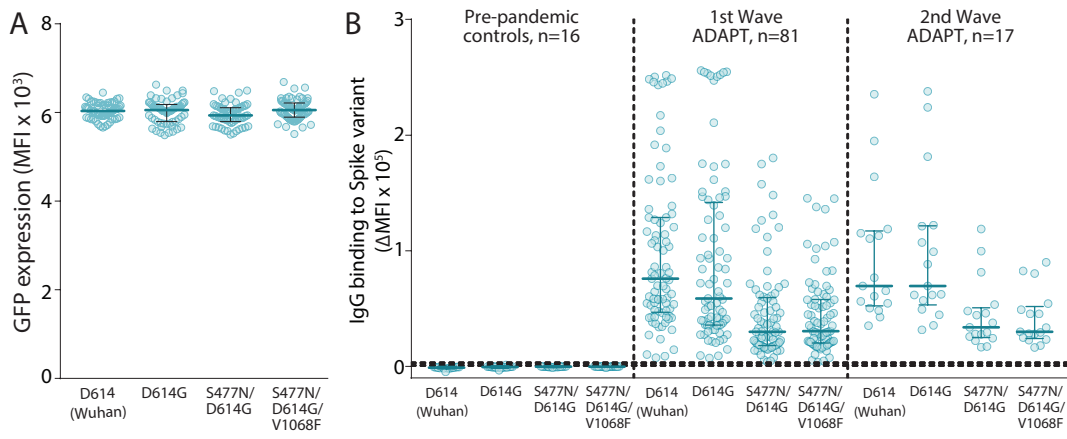

Supplement: Supplementary file [file media-5.pdf]
